# Supplementary material for: Differences in the Effects of Broad-Band UVA and Narrow-Band UVB on Epidermal Keratinocytes
Source: MDPI journal article supplement (doi:10.3390/ijerph182312480), 2021-11-26
Supplement: s1 [file s1]

# Differences in the Effects of Broad-Band UVA and Narrow-Band UVB on Epidermal Keratinocytes

Robert Bajgar <sup>1,2,\*</sup>, Anna Moukova <sup>1</sup>, Nela Chalupnikova <sup>1</sup> and Hana Kolarova <sup>1,2</sup>

<sup>1</sup> Department of Medical Biophysics, Faculty of Medicine and Dentistry, Palacky University in Olomouc, Hnevotinska 3, 775 15 Olomouc, Czech Republic; anna.moukova01@upol.cz (A.M.); nela.chalupnikova01@upol.cz (N.C.); hana.kolarova@upol.cz (H.K.)

<sup>2</sup> Institute of Molecular and Translational Medicine, Faculty of Medicine and Dentistry, Palacky University in Olomouc, Hnevotinska 3, 775 15 Olomouc, Czech Republic

\* Correspondence: robert.bajgar@upol.cz; Tel.: +420-585-632106

## Supplementary Materials: Spectral radiation distribution of the used UV sources

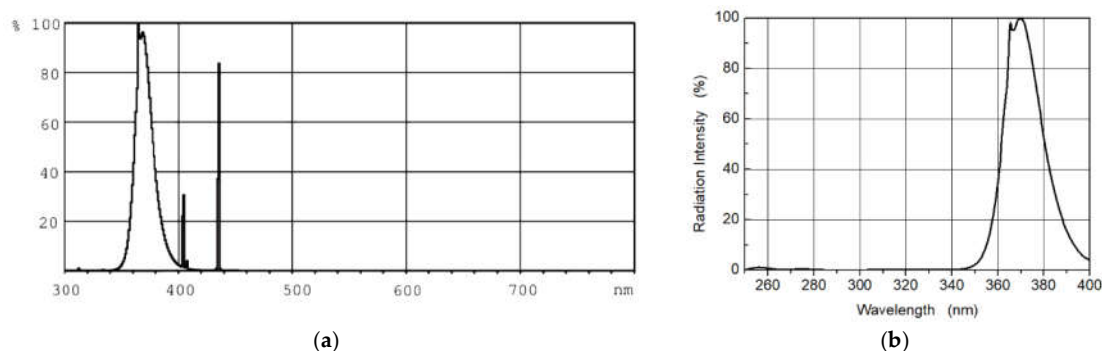

**Figure S1.** Spectral radiation intensity distribution of the broad-band UVA source: (a) declared by the manufacturer (<https://www.assets.signify.com/is/content/PhilipsLighting/fp927903421007-pss-global>); (b) measured by the spectrofluorometer FLS980 (Edinburgh Instruments, UK)

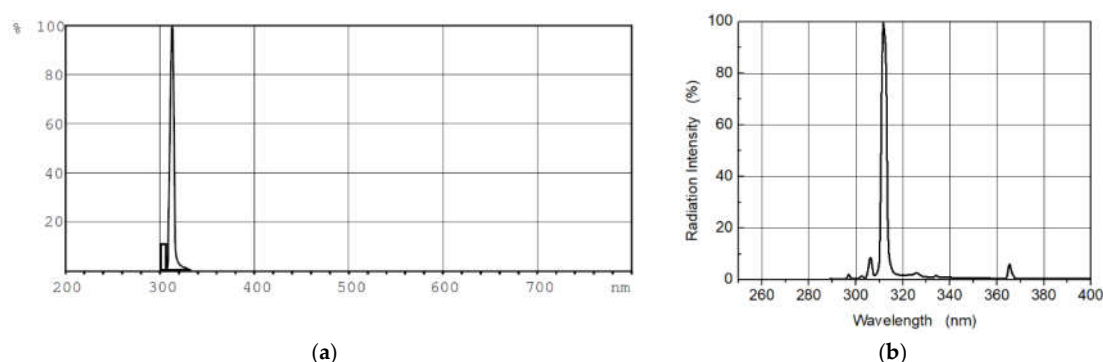

**Figure S2.** Spectral radiation intensity distribution of the narrow-band UVB source: (a) declared by the manufacturer (<https://www.assets.signify.com/is/content/PhilipsLighting/fp927903400121-pss-global>); (b) measured by the spectrofluorometer FLS980 (Edinburgh Instruments, UK)
